# Supplementary material for: The Economic Burden of Stroke Based on South Korea’s National Health Insurance Claims Database
Source: PubMed Central journal article supplement (PMC6186466; doi:10.15171/ijhpm.2018.42), 2018-05-07
Supplement: ijhpm-7-904-s001.pdf [file ijhpm-7-904-s001.pdf]

**Supplementary file 1.** Cost Classification and Data Sources of Economic Burden [*Unit: number, years, %, 1,000 kwn*]

| Cost items               |                      | Data Sources            | Variables                                                                                       |                                                                         |                   |
|--------------------------|----------------------|-------------------------|-------------------------------------------------------------------------------------------------|-------------------------------------------------------------------------|-------------------|
| Direct costs             | Direct medical costs | Inpatient costs         | Main Statistical Data by NHI (2015)                                                             | Total Inpatient Treatment Cost for Ischemic Stroke                      | 1,378,782,325 kwn |
|                          |                      |                         |                                                                                                 | Total Inpatient Treatment Cost for Hemorrhage Stroke                    | 519,458,841 kwn   |
|                          |                      | Outpatient visit costs  | Main Statistical Data by NHI (2015)                                                             | Total Outpatient Visit Treatment Cost for Ischemic Stroke               | 99,382,300 kwn    |
|                          |                      |                         |                                                                                                 | Total Outpatient Visit Treatment Cost for Hemorrhage Stroke             | 14,903,319 kwn    |
|                          |                      | Non-cover care costs    | Investigation on the Current Status of Treatment Cost for Health Insured Patients by NHI (2014) | Non-covered Patient's Burden Rate                                       | 17.1 %            |
|                          |                      |                         | Consumer Price Research by KNSO (2014-2015)                                                     | Inflation Rate                                                          | 0.7 %             |
|                          |                      | Medication costs        | Main Statistical Data by NHI (2015)                                                             | Total Medication Cost and Cost for using Pharmacy for Ischemic Stroke   | 335,280,067 kwn   |
|                          |                      |                         |                                                                                                 | Total Medication Cost and Cost for using Pharmacy for Hemorrhage Stroke | 45,409,058 kwn    |
|                          |                      | Assistive devices costs | Assistive Devices Cost in Kim's study (2010)                                                    | Assistive Device Costs                                                  | 241 kwn           |
|                          |                      |                         | Consumer Price Research by KNSO (2010-2015)                                                     | Inflation Rate                                                          | 9.5 %             |
|                          |                      |                         | Main Statistical Data by NHI (2015)                                                             | Number of Patients of Ischemic Stroke                                   | 463,147 No.       |
|                          |                      |                         |                                                                                                 | Number of Patients of Hemorrhage Stroke                                 | 52,701 No.        |
| Direct non-medical costs | Transportation costs |                         | Family Economy Trend Research by KNSO (2015)                                                    | Average Transportation Cost for Round-Trip                              | 21 kwn            |
|                          |                      |                         | Main Statistical Data by NHI (2015)                                                             | Total Number of Claims for Ischemic Stroke Impatient                    | 308,500 cases     |
|                          |                      |                         |                                                                                                 | Total Number of Claims for Hemorrhage Stroke Impatient                  | 88,920 cases      |
|                          |                      |                         |                                                                                                 | Total Number of Claims for Ischemic Stroke Outpatient Visit             | 2,056,429 cases   |
|                          |                      |                         |                                                                                                 | Total Number of Claims for Hemorrhage Stroke Outpatient Visit           | 237,909 cases     |

|                |                                                                |                                                                                                                                          |                                                   |                |
|----------------|----------------------------------------------------------------|------------------------------------------------------------------------------------------------------------------------------------------|---------------------------------------------------|----------------|
|                | Caregiver's costs                                              | Intermediate Status of Model Project for Institutionalization of Hospital Caregiver Service by the Ministry of Health and Welfare (2010) | Average Daily Caregiver's Cost                    | 33 kwn         |
|                |                                                                | Main Statistical Data by NHI (2015)                                                                                                      | Inpatient Days for Ischemic Stroke                | 6,612,878 days |
|                |                                                                |                                                                                                                                          | Inpatient Days for Hemorrhage Stroke              | 2,064,235 days |
| Indirect costs | Lost productivity due to premature death                       | The Statistical Data of Cause of Death by KNSO (2015)                                                                                    | Number of Patients who Died of Stroke             | 275,895 No.    |
|                |                                                                | Kim's study about Cohort of Death of Patients of Stroke (2015)                                                                           | Rate of Death by Ischemic Stroke                  | 25.9 %         |
|                |                                                                | Life Table by KNSO (2015)                                                                                                                | Rate of Death by Hemorrhage Stroke                | 74.1 %         |
|                |                                                                | Employment, Work, and Income by KNSO (2015)                                                                                              | Life Expectancy                                   | 82.06 years    |
|                |                                                                |                                                                                                                                          | Average Annual Expected Income                    | 39,600 kwn     |
|                |                                                                |                                                                                                                                          | Employment Rate                                   | 62.6 %         |
|                | Lost productivity due to hospitalization and outpatient visits | Main Statistical Data by NHI (2015)                                                                                                      | Outpatient visits of Patient of Ischemic Stroke   | 2,054,188 days |
|                |                                                                |                                                                                                                                          | Outpatient visits of Patient of Hemorrhage Stroke | 237,695 days   |
|                |                                                                | Employment, Work, and Income by KNSO (2015)                                                                                              | Average Daily Income                              | 145 kwn        |

Abbreviation: KNSO, Korea National Statistical Office.
