# Supplementary material for: The Economic Burden of Stroke Based on South Korea’s National Health Insurance Claims Database
Source: PubMed Central journal article supplement (PMC6186466; doi:10.15171/ijhpm.2018.42), 2018-05-07
Supplement: ijhpm-7-904-s002.pdf [file ijhpm-7-904-s002.pdf]

**Supplementary file 2.** Estimation of Indirect Cost of Lost Productivity due to Premature Death by Age

| Age (y)    | Year of Loss<br>(Life Expectancy 82.0)<br>(y) | Employment<br>Rate (%) | Average Annual<br>Income<br>(1000 kwn) | Deaths (n)     |          |             | Cost of Lost Productivity Due<br>to Premature Death<br>(1000 kwn) |             | Cost of Lost Productivity<br>Due to Premature Death<br>(1000 kwn) |
|------------|-----------------------------------------------|------------------------|----------------------------------------|----------------|----------|-------------|-------------------------------------------------------------------|-------------|-------------------------------------------------------------------|
|            |                                               |                        |                                        | KCD<br>I60-I69 | Ischemic | Hemorrhagic | Ischemic                                                          | Hemorrhagic | Stroke                                                            |
| 20~29 (25) | 57.06                                         | 57.9                   | 25,680                                 | 50             | 13       | 37          | 10,986                                                            | 31,433      | 42,420                                                            |
| 30~39 (35) | 47.06                                         | 74.2                   | 37,655                                 | 197            | 51       | 146         | 67,087                                                            | 191,938     | 259,026                                                           |
| 40~49 (45) | 37.06                                         | 79.1                   | 44,510                                 | 867            | 225      | 642         | 292,993                                                           | 838,256     | 1,131,249                                                         |
| 50~59 (55) | 27.06                                         | 74.4                   | 40,975                                 | 1,794          | 465      | 1,329       | 383,302                                                           | 1,096,630   | 1,479,933                                                         |
| 60~69 (65) | 17.06                                         | 38.9                   | 28,690                                 | 2,572          | 666      | 1,906       | 126,832                                                           | 362,867     | 489,700                                                           |
|            |                                               |                        |                                        |                | 1,419    | 4,061       | 881,203                                                           | 2,521,126   | 3,402,329                                                         |

Abbreviations: kwn, Korean won; KCD, Korean Standard Classification of Diseases.
